# Supplementary material for: Development of mouse models of angiosarcoma driven by p53
Source: Oxford University Press journal article supplement (doi:10.1242/dmm.038612), 2019-06-20
Supplement: dmm038612supp.pdf [file dmm038612supp.pdf]

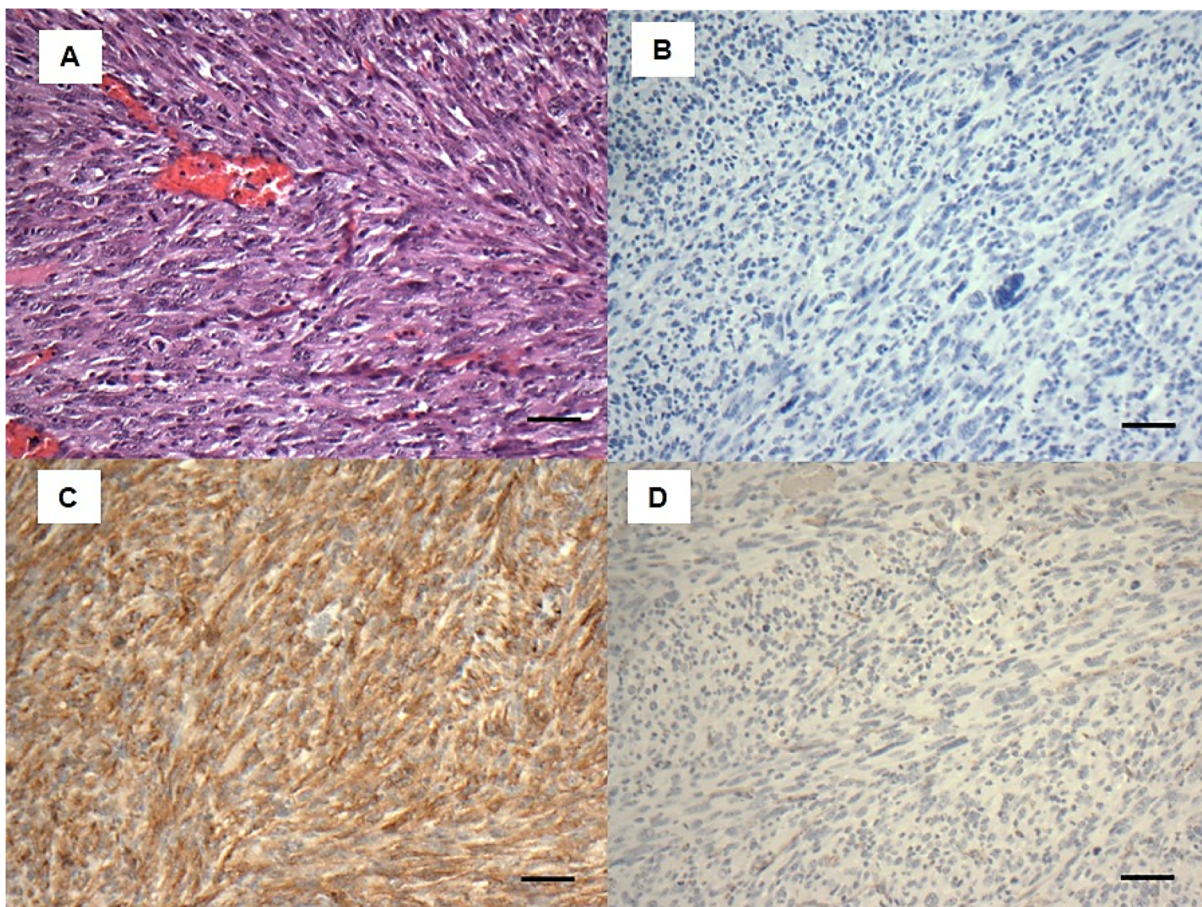

**Figure S1.** Immunohistochemistry of mouse undifferentiated sarcomas. (A) H&E staining showed tumours comprising spindle and pleomorphic cells without evidence of specific lineage differentiation histologically. Cells were (B) negative for p53, (C) positive for PDGFR $\beta$  and (D) negative for CD31. Scale bars = 50  $\mu$ m.

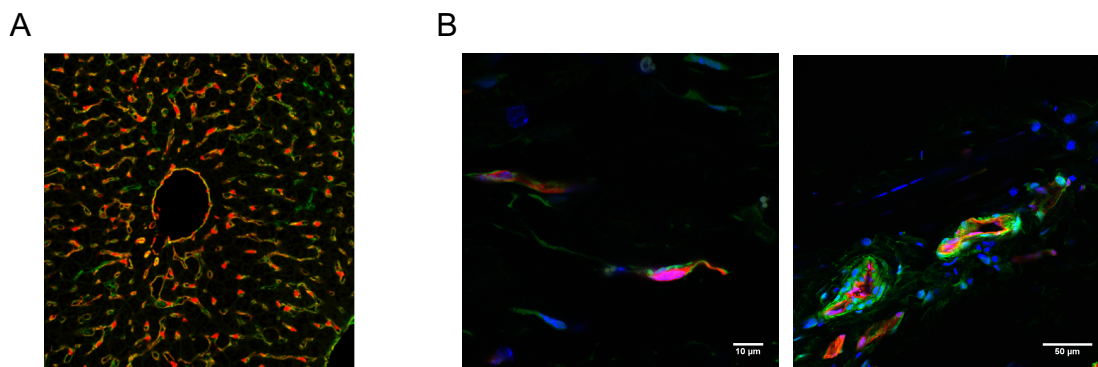

**Figure S2.** Confocal micrographs of fixed frozen liver (A) and dorsal skin (B) from *Cdh5-CreER<sup>T2</sup>* mouse crossed with a tdTomato floxed reporter (*Ai14; Cdh5-CreER<sup>T2</sup>*) showing cytosolic tdTomato fluorescence (red) and CD31 antibody cell surface staining (green). DAPI (blue) indicates nuclei.
